# Supplementary material for: Chimpanzees produce diverse vocal sequences with ordered and recombinatorial properties
Source: PubMed Central journal article supplement (PMC9110424; doi:10.1038/s42003-022-03350-8), 2022-05-16
Supplement: 42003_2022_3350_MOESM2_ESM.pdf [file 42003_2022_3350_MOESM2_ESM.pdf]

1 **SUPPLEMENTARY MATERIAL for:**

2 **Chimpanzees produce diverse vocal sequences with ordered and recombinatorial properties**

3

4 **Cédric Girard-Buttoz<sup>1,2,3,4&</sup>, Emiliano Zaccarella<sup>5&</sup>, Tatiana Bortolato<sup>2,3,4</sup>, Angela D. Friederici<sup>5</sup>**

5 **Roman M. Wittig<sup>2,3,4</sup>, Catherine Crockford<sup>1, 2, 3,4</sup>**

6

7

8

9

10

11

12

13

14

15

16

17

18

19

20 **Supplementary discussion**

21 Two-unit and longer sequences appear throughout the chimpanzee vocal repertoire and are not limited  
22 to the well-described four-unit pant-hoot sequence of the chimpanzees includes single hoos (HO) – panting hoos  
23 (PH) – climax phase (panted screams (PS) or panting bark (PB)), and let down phase (panted roars (PR) or  
24 pants (PN))<sup>43,105</sup>. Whilst our trigram analysis includes three sets of bigrams that can be emitted  
25 independently or produced as part of the pant hoot sequence (head: HO\_PH, PH\_PS; tail: PH\_PS), the  
26 other bigram GR-PG which appears in tail and head position is not part of pant-hoot sequence. Likewise,  
27 many other frequent (above chance) bigrams and trigrams we have identified are never emitted as part  
28 of a pant hoot sequence (e.g., HO\_PG, GR\_PG\_PN, GR\_PG\_PB, PG\_PB\_BK **Fig. 3A, S3 D, E and F, and S5**).

29

30

31

32

33

34

35

36

37

38

39

40 **Supplementary Figures**

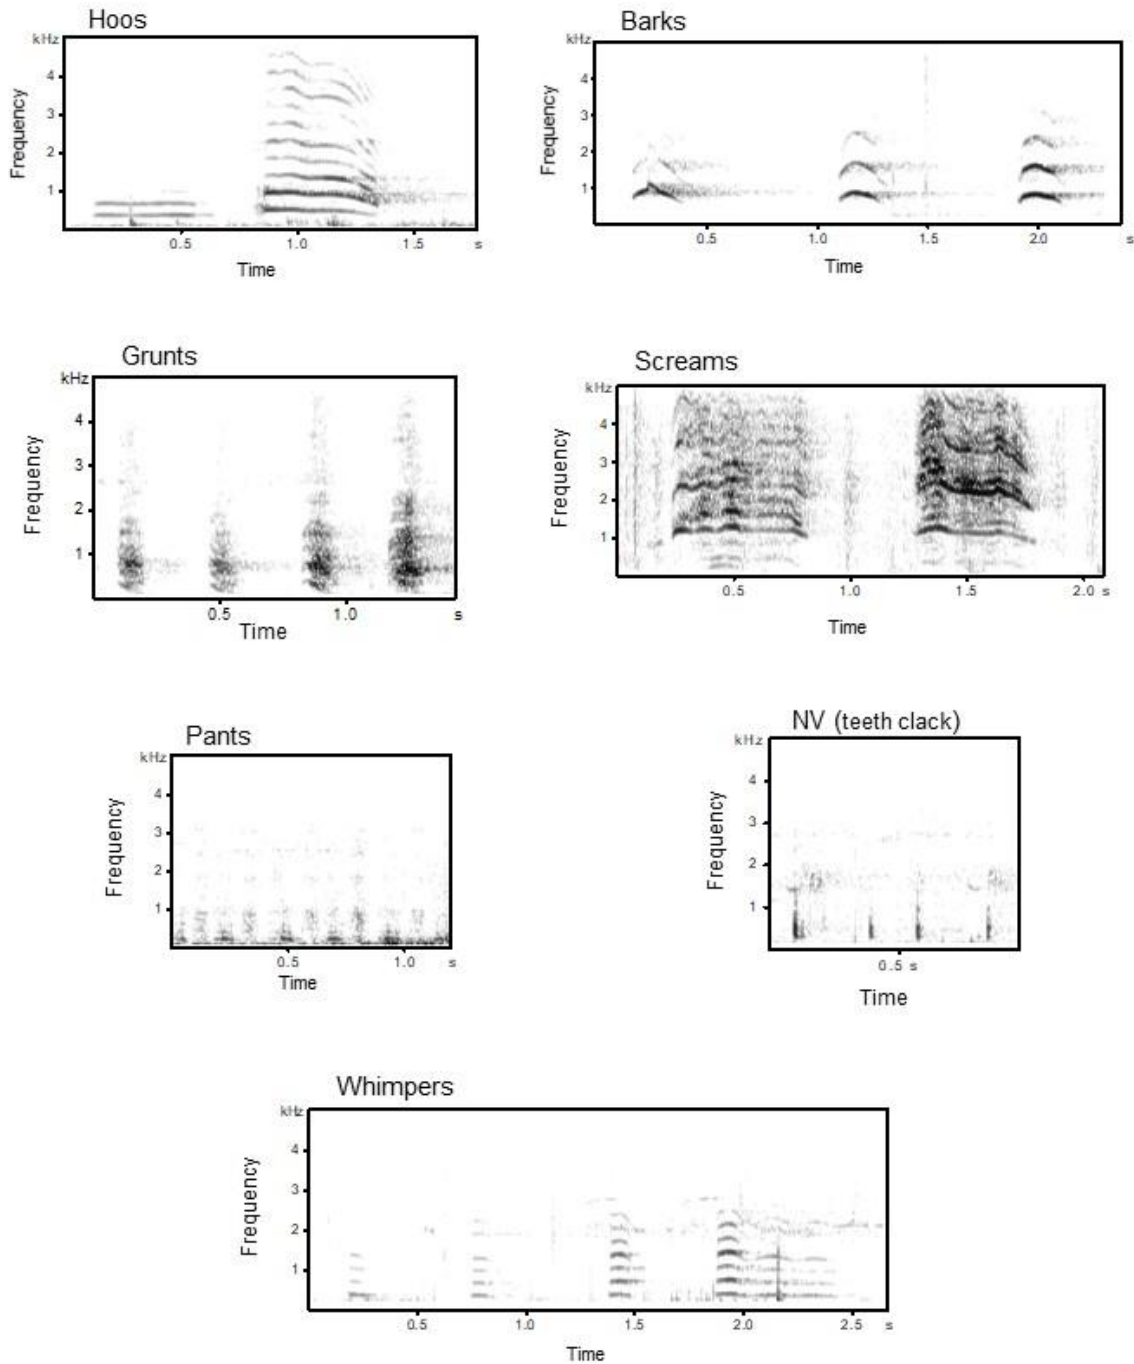

41

42 **Supplementary Figure 1: Spectrograms of chimpanzee single-unit vocalizations.**

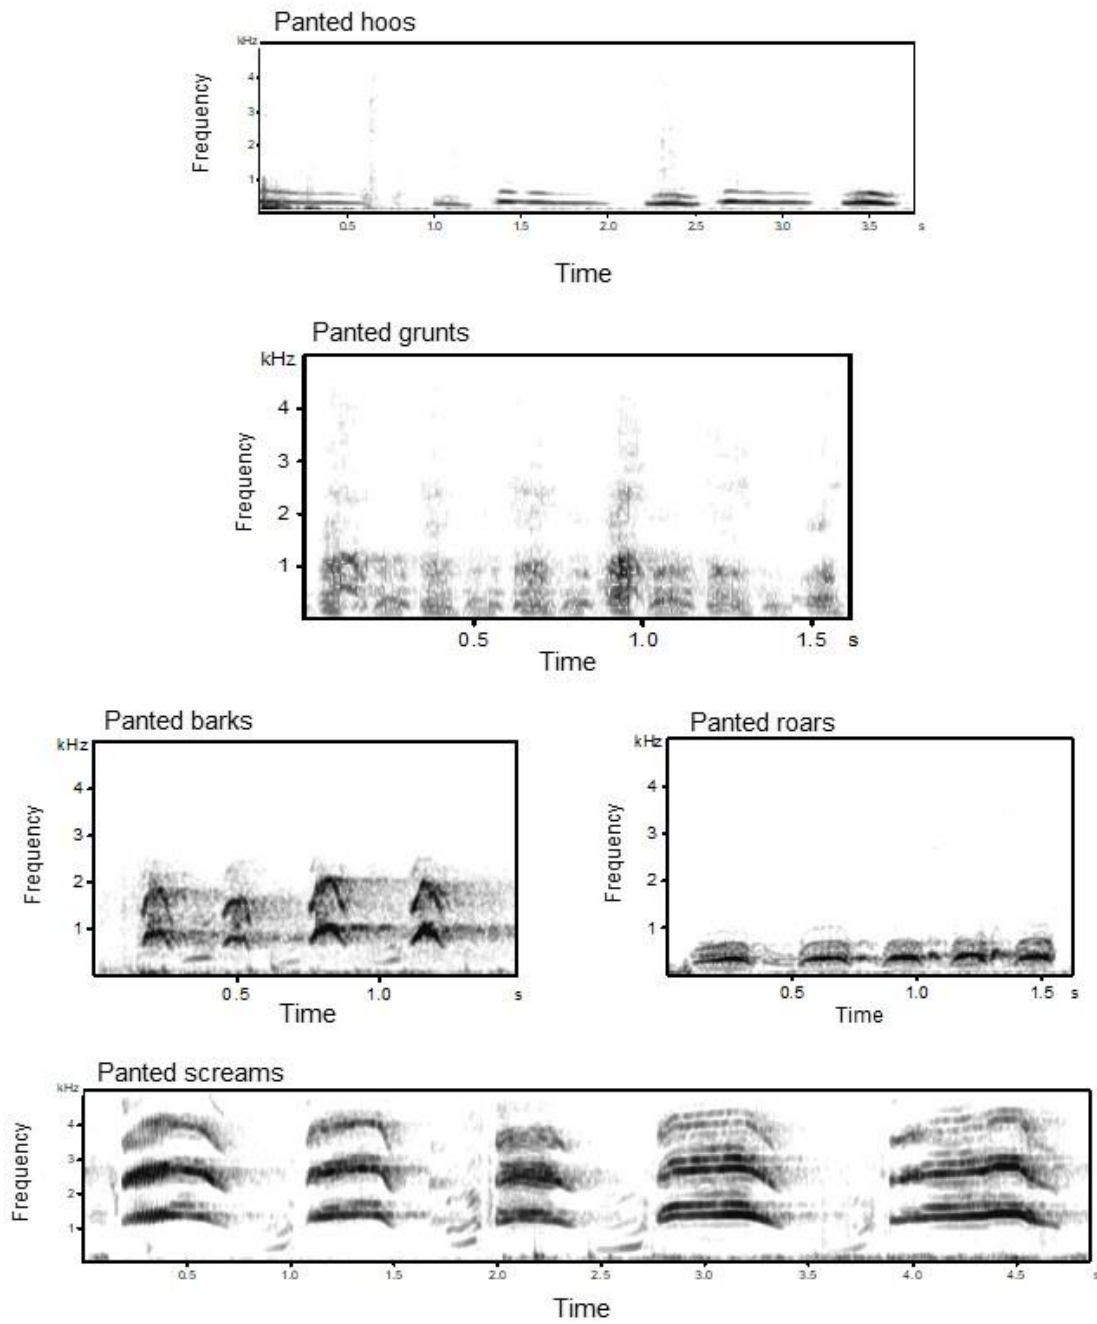

43

44 **Supplementary Figure 2:** Spectrograms of chimpanzee panting-unit vocalizations. Roars only occurred as

45 a panting form.

46

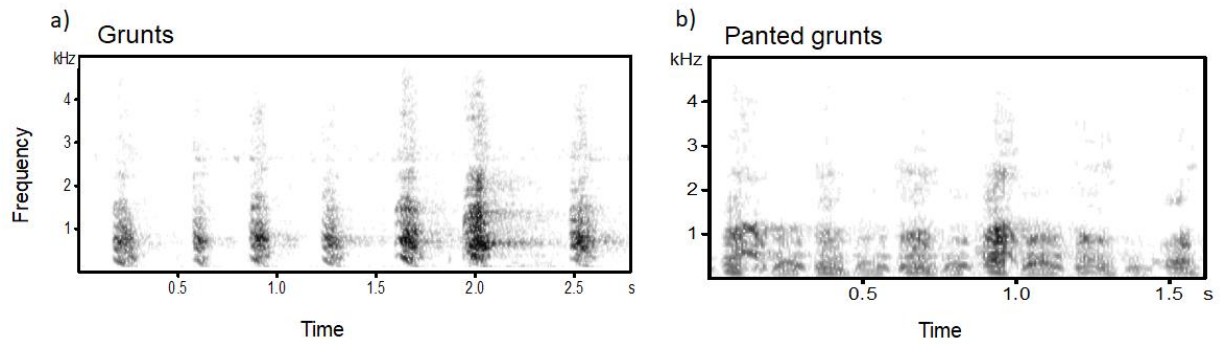

47

48 **Supplementary Figure 3: An example showing the construction of chimpanzee single units.**

49 Spectrograms show (a) a single non-panted call (e.g., series of Grunts) and (b) a single panted call (e.g.,  
50 series of Panted grunts).

51

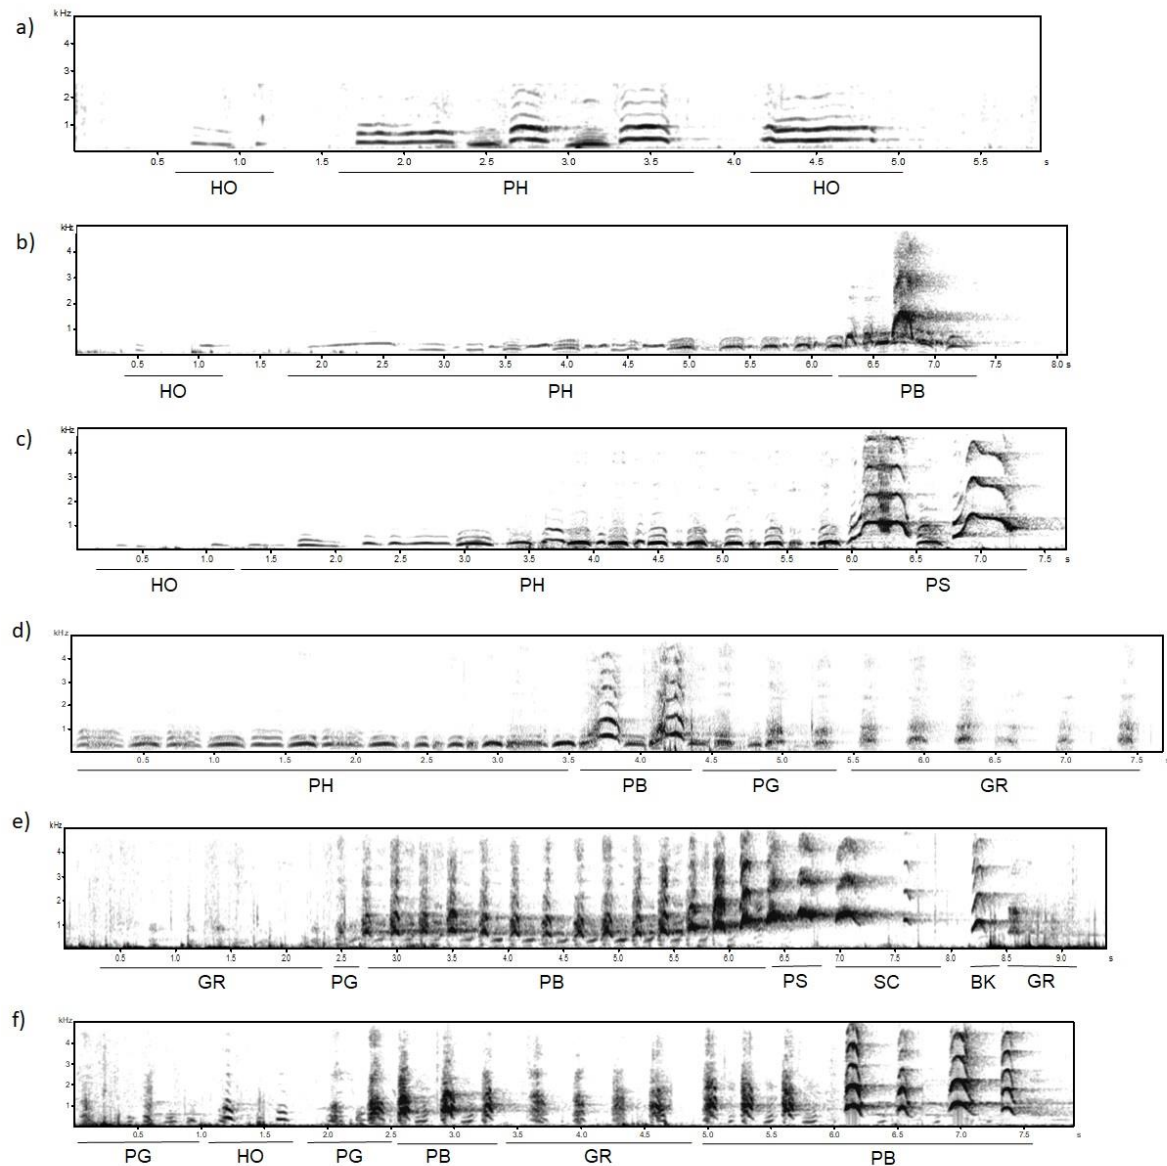

52

53 **Supplementary Figure 4: An example showing the construction of chimpanzee sequences.** Frequency

54 (kHz) in y-axis and time (seconds) in x-axis. Spectrograms (a), (b) and (c) show three-unit sequences

55 (trigrams) composed by Hoos (single hoo in (a) or series of hoos in (b) and (c)) and series of Panted hoos

56 followed by either a Hoo (a), series of Panted barks (b) or series of Panted screams (c). Spectrogram (d)

57 shows a four-unit sequence composed by series of: Panted hoos, Panted barks, Panted grunts and finally

58 Grunts. Spectrograms (e) and (f) show different long sequences without the structure of the classic Pant-

59 hoot call. The sequence in (e) is composed of Grunts, a single Panted Grunt, Panted barks, Panted  
60 screams, Screams, a single Bark and Grunts. Sequence (f) is composed of Panted grunts, Hoos, Panted  
61 grunts, Panted barks, Grunts, and Panted barks.

62

63

64

65

66

67

68

69

70

71

72

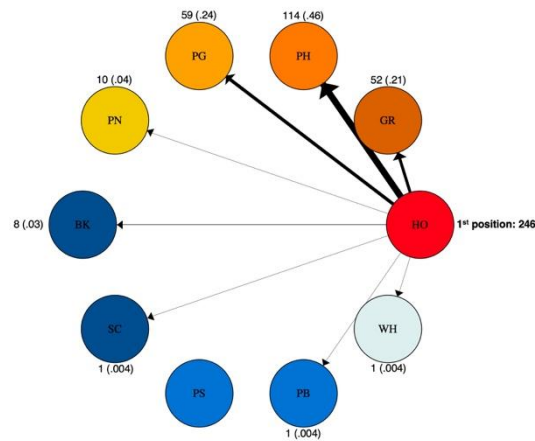

73 **Supplementary Figure 5.** Example of two-unit sequences (bigrams) given a certain call in position one  
74 (HO). Colours represent the number of times a certain unit is found in the bigram sample (red-to-  
75 turquoise). The size of the directional edges (arrows) express the number of times that specific bigram is  
76 found in the study (thick-to-thin). The values on each calls express the number of times that the unit is  
77 found in position two with HO in position one, with corresponding percent value.

78

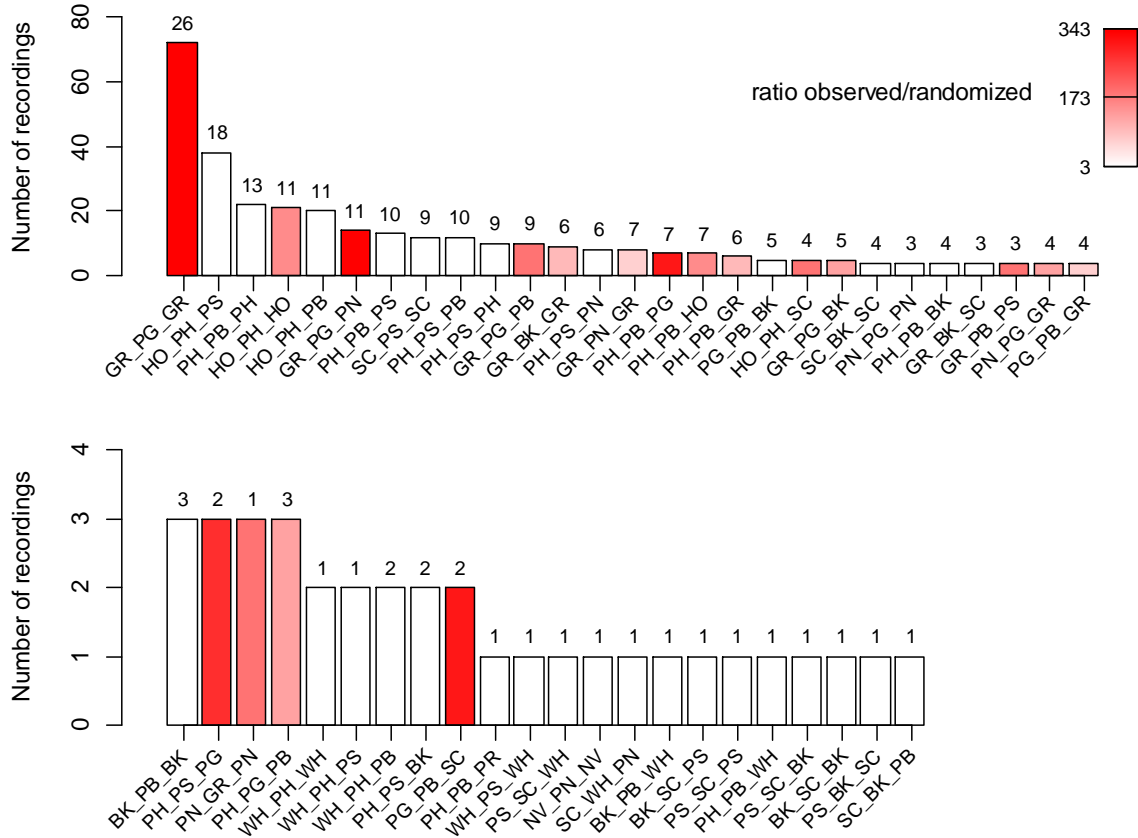

79

80 **Supplementary Figure 6:** Frequency of production of three-unit sequences (trigrams) that are produced  
 81 above chance (i.e., 95% more likely than by random juxtaposition of single units). The height of each bar  
 82 corresponds to the number of time each trigram was recorded. The colour gradient in the bars depicts  
 83 the number of time each trigram was observed divided by the number of time each trigram was present  
 84 on average in each randomization (averaged over 1000 randomizations). The colour range from the lowest  
 85 in white (i.e., the trigram was present in the randomization three times less than the number of times it  
 86 was observed) to the highest ratio in red (i.e., the trigram was present in the randomization 343 times less  
 87 than the frequency at which it was observed). The number on top of each bar indicates the number of  
 88 individual that produced each trigram. The abbreviation for the call names (or single units) are as in **Table**  
 89 **1.**



90

91

92

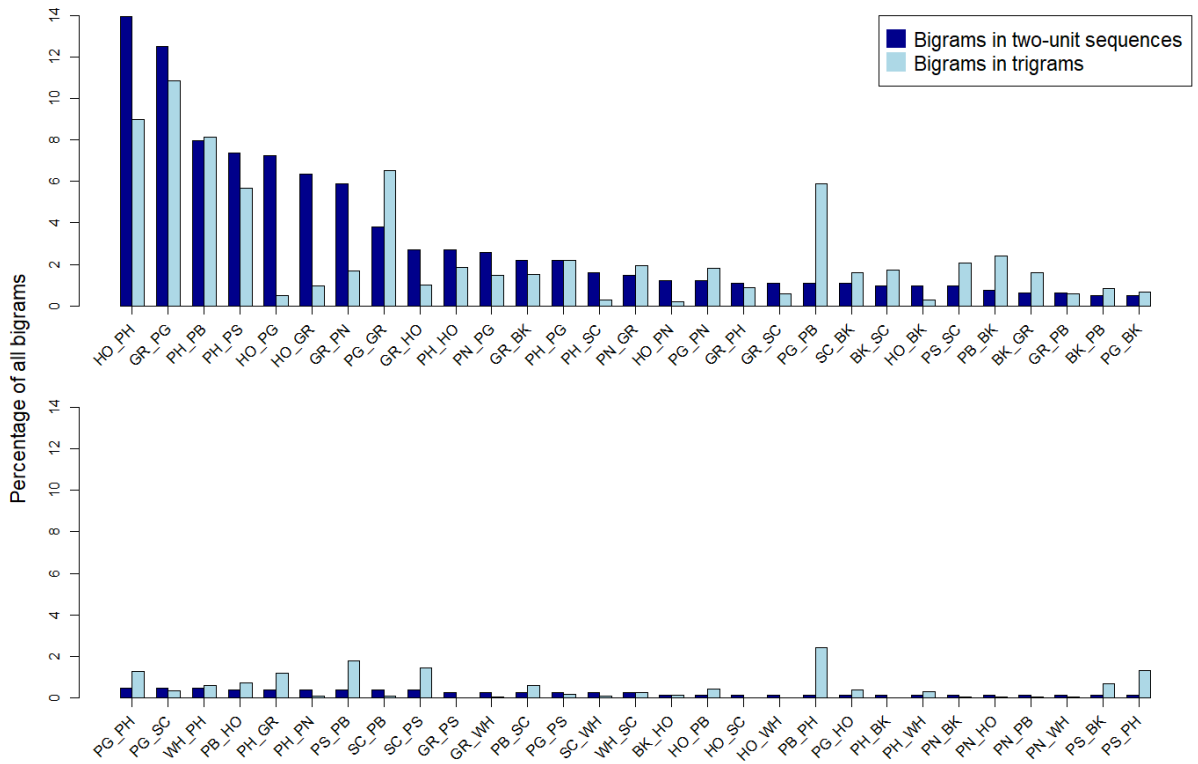

93

94 **Supplementary Figure 7:** Frequency distribution of bigrams in two-unit sequences (dark blue) and of  
 95 bigrams within three-unit sequences (trigrams, light blue). The height of the bars indicates the percentage  
 96 of occurrence of each bigram within each frequency distribution as a percentage of all bigrams recorded.  
 97 The abbreviation for the unit names are as in Table 1.

98

99

100

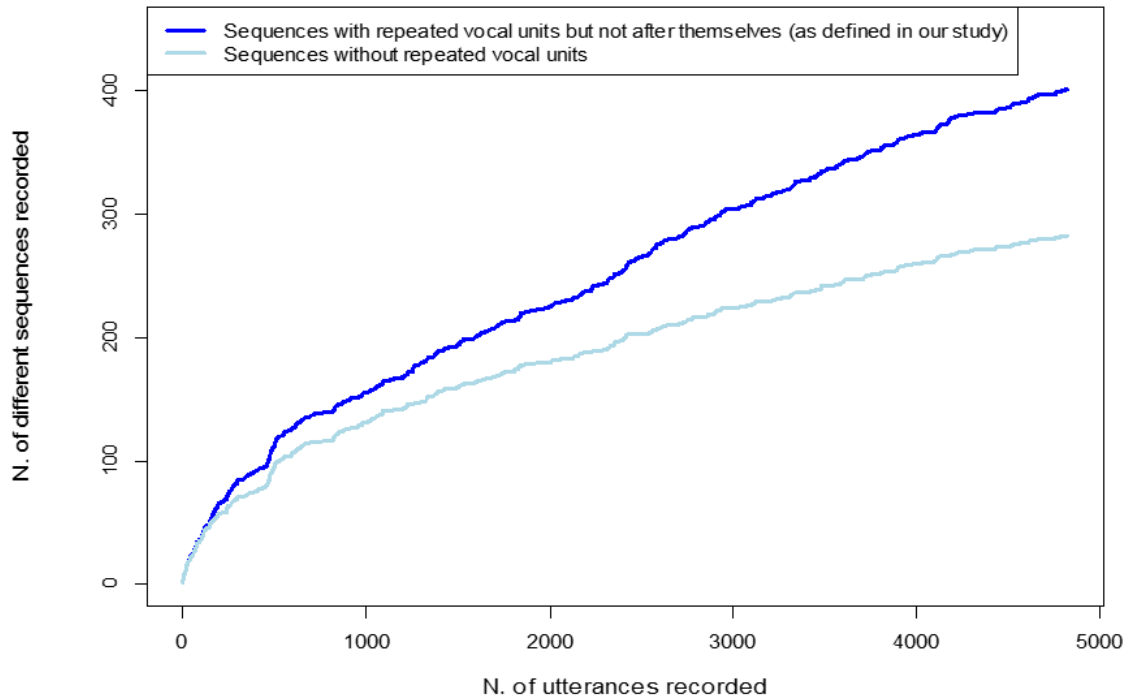

101

102 **Supplementary Figure 8:** Number of different vocal sequences found in the Tai chimpanzee vocal  
 103 repertoire as a function of the number of utterances recorded.

104 The dark blue line depicts the number of unique sequences as defined in our study. The sequence  
 105 considered are the ones where the same single unit can occur more than ones within the sequence but  
 106 not after itself. For instance, A\_A\_A\_B\_C would be coded as A\_B\_C and be no different to an A\_B\_C  
 107 sequence. In contrast, A\_B\_C\_A would be different from A\_B\_C or from B\_C\_A since A appears twice in  
 108 the sequence but not after itself.

109 The light blue line depicts the number of unique sequences in which the same single unit is not repeated  
 110 at all. For instance, the sequence A\_B\_A\_C would be considered the same as the sequence A\_B\_C since  
 111 the repetition of A in the first sequence would not be taken into account).

112 We depict here these two quantification methods since both methods are used in the primate vocal  
 113 communication literature to assess the diversity of sequences produced by other primate species.

114

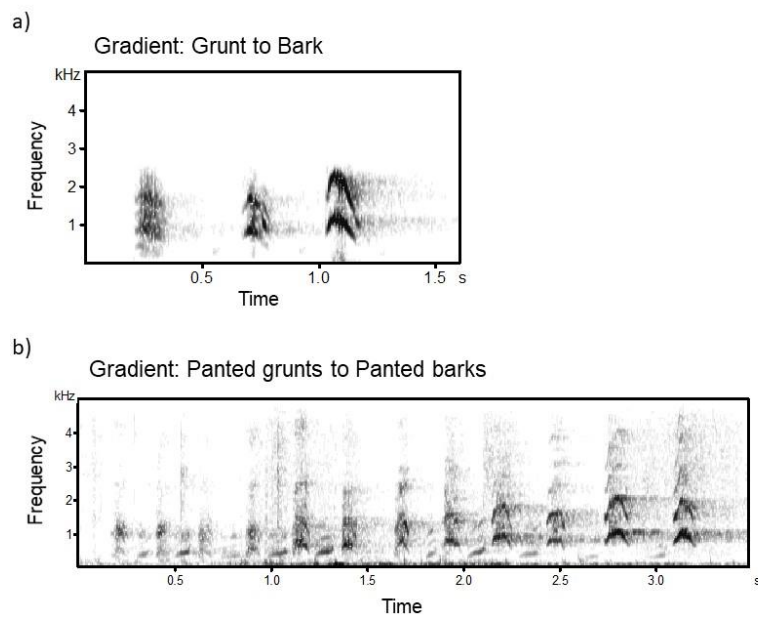

115

116 **Supplementary Figure 9:** Spectrograms of chimpanzees' graded vocal system showing (a) a gradient  
117 from a Grunt to a Bark; and (b) a gradient from Panted-grunts to Panted-barks.

118

119

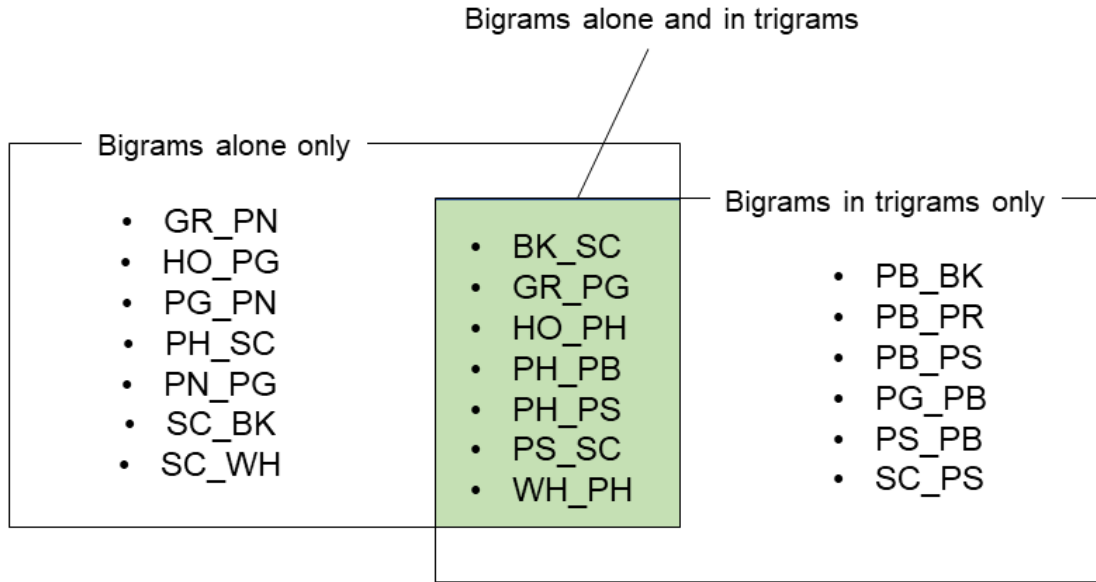

120

121

122 **Supplementary Figure 10:** Illustration of bigrams produced above chance which were produced only as  
 123 bigrams alone, as bigrams within trigrams or both.

124

125

126

127

128

129

130

131

132 **Supplementary Tables**

133 **Supplementary Table 1: Positional occurrences in two-unit sequences (bigrams)**

|                |       | second position |     |    |    |     |     |     |    |    |    |    |     |       |
|----------------|-------|-----------------|-----|----|----|-----|-----|-----|----|----|----|----|-----|-------|
| first position | unit  | BK              | GR  | HO | NV | PB  | PG  | PH  | PN | PR | PS | SC | WH  | total |
|                | BK    | 5               | 1   | 0  | 4  | 0   | 0   | 0   | 0  | 0  | 0  | 8  | 0   | 18    |
|                | GR    | 18              | 22  | 0  | 5  | 102 | 9   | 48  | 0  | 2  | 9  | 2  | 217 |       |
|                | HO    | 8               | 52  | 0  | 1  | 59  | 114 | 10  | 0  | 0  | 1  | 1  | 246 |       |
|                | NV    | 0               | 0   | 0  | 0  | 0   | 0   | 0   | 0  | 0  | 0  | 0  | 0   |       |
|                | PB    | 6               | 0   | 3  | 0  | 0   | 1   | 0   | 0  | 0  | 0  | 2  | 0   | 12    |
|                | PG    | 4               | 31  | 1  | 0  | 9   | 4   | 10  | 0  | 2  | 4  | 0  | 65  |       |
|                | PH    | 1               | 3   | 22 | 0  | 65  | 18  | 3   | 0  | 60 | 13 | 1  | 186 |       |
|                | PN    | 1               | 12  | 1  | 0  | 1   | 21  | 0   | 0  | 0  | 0  | 0  | 1   | 37    |
|                | PR    | 0               | 0   | 0  | 0  | 0   | 0   | 0   | 0  | 0  | 0  | 0  | 0   |       |
|                | PS    | 1               | 0   | 0  | 0  | 3   | 0   | 1   | 0  | 0  | 8  | 0  | 13  |       |
|                | SC    | 9               | 0   | 0  | 0  | 3   | 0   | 0   | 0  | 0  | 3  | 2  | 17  |       |
|                | WH    | 0               | 0   | 0  | 0  | 0   | 0   | 4   | 0  | 0  | 0  | 2  | 6   |       |
|                | total | 48              | 103 | 50 | 0  | 91  | 200 | 133 | 71 | 0  | 67 | 47 | 7   | 817   |

134

135

136 **Supplementary Table 2: Positional occurrences in three-unit sequences (trigrams)**

137

| two-unit | Head | Tail | total |
|----------|------|------|-------|
| HO_PH    | 94   | 0    | 94    |
| GR_PG    | 105  | 8    | 113   |
| PH_PB    | 62   | 25   | 87    |
| PH_PS    | 36   | 40   | 76    |
| PN_PG    | 10   | 3    | 13    |

138

139

140

141

142 **Supplementary Table 3: Transitional relationships (forward) in three-unit sequences (trigrams)**

143

|                |       | two-unit utterance |       |       |       |       |       |       |
|----------------|-------|--------------------|-------|-------|-------|-------|-------|-------|
| following_call | unit  | GR_PG              | GR_PN | HO_PG | HO_PH | PH_PB | PH_PS | PN_PG |
|                | BK    | 5                  | 0     | 0     | 0     | 4     | 2     | 0     |
|                | GR    | 72                 | 8     | 1     | 6     | 6     | 0     | 4     |
|                | HO    | 0                  | 0     | 2     | 21    | 7     | 0     | 0     |
|                | NV    | 0                  | 1     | 0     | 0     | 0     | 0     | 0     |
|                | PB    | 10                 | 0     | 0     | 20    | 0     | 12    | 0     |
|                | PG    | 0                  | 2     | 0     | 3     | 7     | 3     | 0     |
|                | PH    | 2                  | 0     | 2     | 0     | 22    | 10    | 2     |
|                | PN    | 14                 | 0     | 1     | 0     | 0     | 8     | 4     |
|                | PR    | 0                  | 0     | 0     | 0     | 1     | 0     | 0     |
|                | PS    | 1                  | 0     | 0     | 38    | 13    | 0     | 0     |
|                | SC    | 1                  | 0     | 0     | 5     | 1     | 1     | 0     |
|                | WH    | 0                  | 0     | 0     | 1     | 1     | 0     | 0     |
|                | total | 105                | 11    | 6     | 94    | 62    | 36    | 10    |

144

145

146

147

148

149

150

151 **Supplementary Table 4: Transitional relationships (backward) in three-unit sequences (trigrams)**

152

two-unit utterance

153

154

155

156

157

preceding unit

| two-unit | GR_PG | GR_PN | HO_PG | HO_PH | PH_PB | PH_PS | PN_PG |
|----------|-------|-------|-------|-------|-------|-------|-------|
| BK       | 0     | 0     | 0     | 0     | 1     | 0     | 0     |
| GR       | 0     | 0     | 0     | 0     | 1     | 0     | 2     |
| HO       | 3     | 2     | 0     | 0     | 20    | 38    | 1     |
| NV       | 0     | 0     | 0     | 0     | 0     | 0     | 0     |
| PB       | 0     | 0     | 0     | 0     | 0     | 0     | 0     |
| PG       | 2     | 0     | 0     | 0     | 1     | 0     | 0     |
| PH       | 1     | 1     | 0     | 0     | 0     | 0     | 0     |
| PN       | 2     | 3     | 0     | 0     | 0     | 0     | 0     |
| PR       | 0     | 0     | 0     | 0     | 0     | 0     | 0     |
| PS       | 0     | 0     | 0     | 0     | 0     | 0     | 0     |
| SC       | 0     | 0     | 0     | 0     | 0     | 0     | 0     |
| WH       | 0     | 0     | 0     | 0     | 2     | 2     | 0     |
| total    | 8     | 6     | 0     | 0     | 25    | 40    | 3     |

158

159

160

161

162

163

164

165
