# Supplementary material for: Chimpanzees produce diverse vocal sequences with ordered and recombinatorial properties
Source: PubMed Central journal article supplement (PMC9110424; doi:10.1038/s42003-022-03350-8), 2022-05-16
Supplement: 42003_2022_3350_MOESM3_ESM.pdf [file 42003_2022_3350_MOESM3_ESM.pdf]

## Description of Additional Supplementary Files

**File name:** Supplementary Data 1

**Description:** Details of single unit and the sequences of different length recorded.

**File name:** Supplementary Data 2

**Description:** Source data for figures.
